# Supplementary material for: The Many Faces of Huntington’s Chorea Treatment: The Impact of Sudden Withdrawal of Tiapride after 40 Years of Use and a Systematic Review
Source: MDPI journal article supplement (doi:10.3390/jpm12040589), 2022-04-06
Supplement: s1 [file s1]

## **SUPPLEMENTARY MATERIAL**

### **A. Search strategy**

#### **Inclusion criteria:**

- Original research (not necessarily peer-reviewed). Recent poster presentations and conference abstracts allowed.
- Descriptions of (possible) effects, either positive or negative, of tiapride on Huntington's Disease symptoms. Surveys among Huntington's Disease experts and clinicians are allowed.
- Genetically proven Huntington's Disease. CAG repeat length  $\geq 36$ .
- Human or animal model.
- Language: English, Dutch, German or French.
- No date of publication restrictions.

#### **Exclusion criteria:**

- Book chapters, research protocols.
- Case reports ( $n = 1$ ).
- No Huntington's Disease, e.g. Huntington's Disease-like syndromes etc.

#### **PubMed**

Search conducted on 17 November 2021

("tiaprid"[All Fields] OR "tiapride hydrochloride"[MeSH Terms] OR ("tiapride"[All Fields] AND "hydrochloride"[All Fields]) OR "tiapride hydrochloride"[All Fields] OR "tiapridal"[All Fields] OR "tiapride"[All Fields] OR ("tiaprid"[All Fields] OR "tiapride hydrochloride"[MeSH Terms] OR ("tiapride"[All Fields] AND "hydrochloride"[All Fields]) OR "tiapride hydrochloride"[All Fields] OR "tiapridal"[All Fields] OR "tiapride"[All Fields]) OR ("tiaprid"[All Fields] OR "tiapride hydrochloride"[MeSH Terms] OR ("tiapride"[All Fields] AND "hydrochloride"[All Fields]) OR "tiapride hydrochloride"[All Fields] OR "tiapridal"[All Fields] OR "tiapride"[All Fields])) AND ("huntington"[All Fields] OR "huntington s"[All Fields] OR "huntingtons"[All Fields] OR ("huntington"[All Fields] OR "huntington s"[All Fields] OR "huntingtons"[All Fields]))

#### **Web of Science**

Search conducted on 17 November 2021

All databases: ((TS=(tiapride)) OR TS=(tiapridal) OR TS=(tiaprid)) AND (TS=(Huntington) OR TS=(Huntington's))

#### **PsychINFO**

Search conducted on 17 November 2021

TX ((tiapride OR tiapridal OR tiaprid)) AND TX ((Huntington OR Huntington's))

#### **Embase**

Search conducted on 17 November 2021

((tiapride or tiapridal or tiaprid) and (Huntington or Huntington's)).af.

All resources: University Leiden Ovid JournalsJournals@Ovid Full Text <November 17, 2021>University Leiden Ovid BooksEmbase <1974 to 2021 November 17>ERIC <1965 to November 2021>Ovid Emcare <1995 to 2021 Week 46>Inspec Archive - Science Abstracts <1898 to 1968>Ovid MEDLINE(R) ALL <1946 to November 17, 2021>

#### **Cochrane Library**

Search conducted on 17 November 2021

((tiapride or tiapridal or tiaprid) AND (Huntington OR Huntington's)) in Title Abstract Keyword
